# Supplementary material for: Abyssinone V‐4′ Methyl Ether, a Flavanone Isolated from Erythrina droogmansiana, Exhibits Cytotoxic Effects on Human Breast Cancer Cells by Induction of Apoptosis and Suppression of Invasion
Source: Hindawi journal article supplement (doi:10.1155/2020/6454853), 2020-01-01
Supplement: f1 [file 6454853.f1.pdf]

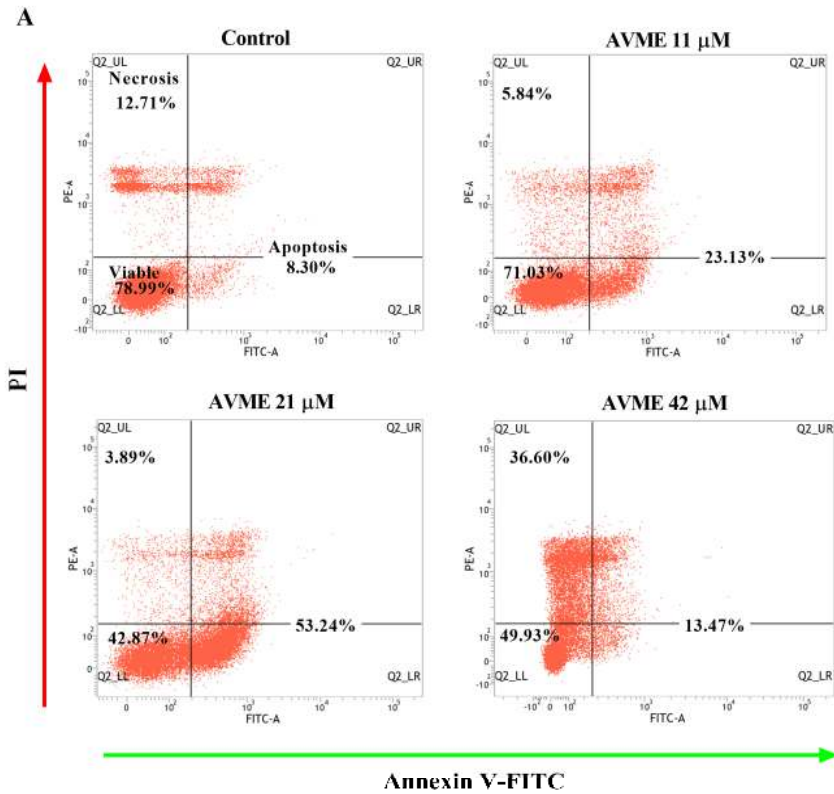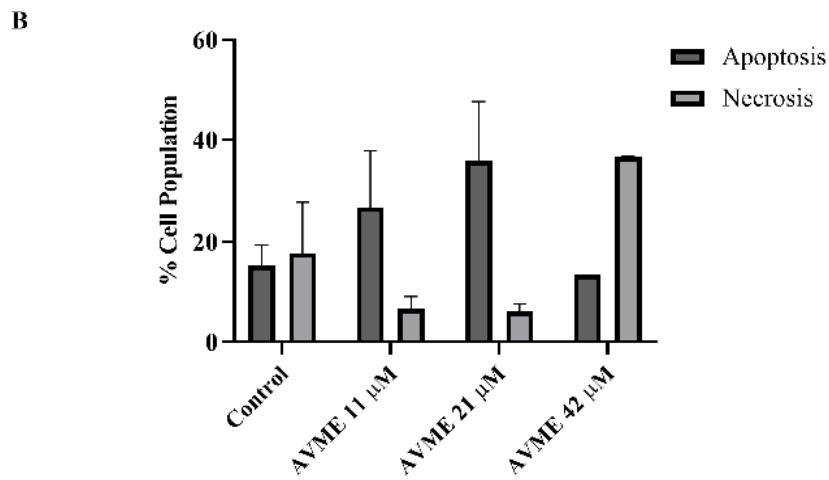

Suppl Figure 1. Dot plot (A) representative of one experiment of apoptosis measurement by Annexin-V-FITC/PI staining MCF-7 cells. Cells were treated for 24 h to AVME at concentrations of 11, 21 and 42  $\mu$ M. The graph (B) shows the percentage of cells in apoptosis or necrosis of 3 independent experiments.

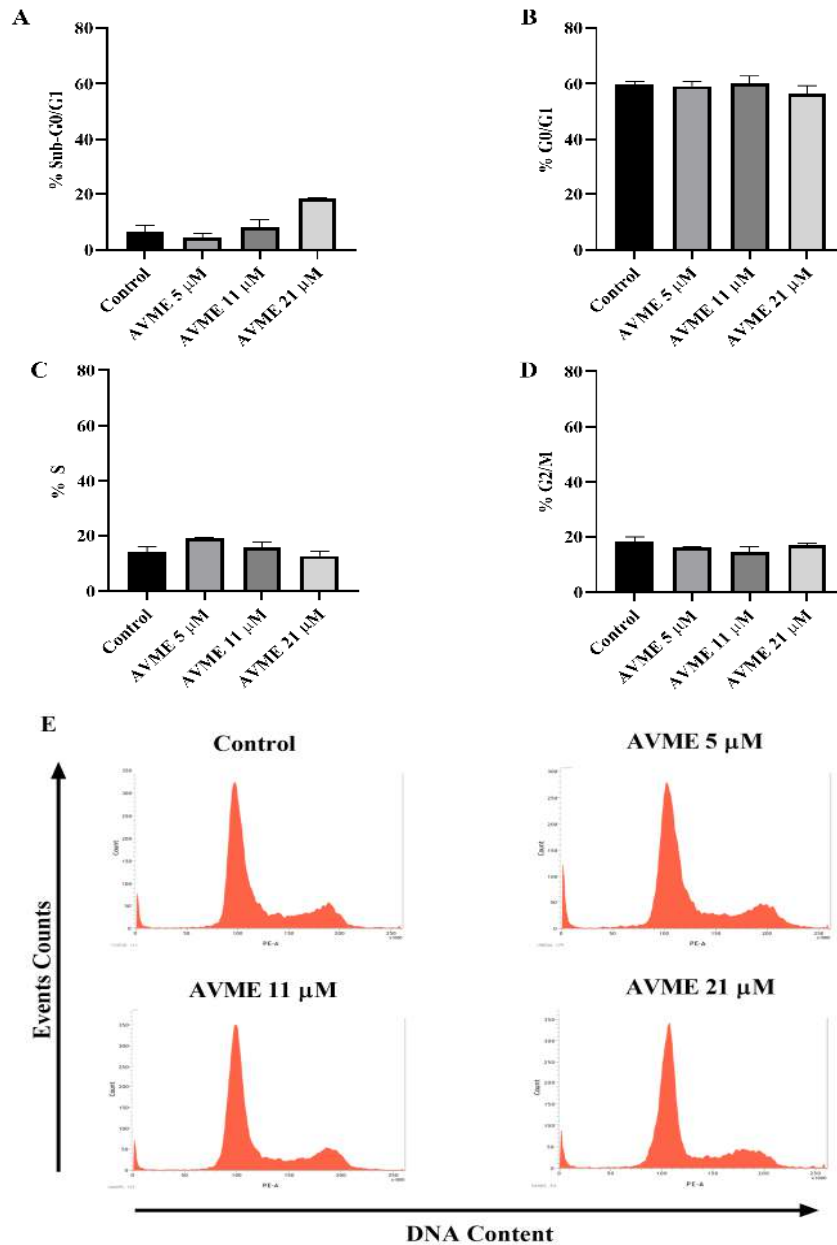

Suppl Figure 2. Effect of AVME on cell cycle distribution in MCF-7 cells after 24 h. Cells were treated for 24 h with 5, 11 and 21  $\mu$ M of AVME and stained with PI. Following flow cytometry, cellular DNA profile was analyzed using the software WinMDI 2.9. Data representing the percentage of cell counts in Sub-G0/G1 (A), G0/G1 (B), S (C) and G2/M (D) phases. Histograms (E) representative of one experiment of cell cycle. The results are expressed as the percentage of cell in each cell cycle phase of three independent experiments.
